# Supplementary material for: Synthesis of Substituted Pyrrole Derivatives Based on 8-azaspiro[5.6]dodec-10-ene Scaffold
Source: Preprints.org preprint supplement (doi:10.20944/preprints202312.2014.v1), 2023-12-27

---

The following ALERTS were generated. Each ALERT has the format

**test-name\_ALERT\_alert-type\_alert-level.**

Click on the hyperlinks for more details of the test.

---

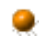

#### Alert level B

PLAT026\_ALERT\_3\_B Ratio Observed / Unique Reflections (too) Low .. 33% Check  
PLAT340\_ALERT\_3\_B Low Bond Precision on C-C Bonds ..... 0.01407 Ang.  
PLAT411\_ALERT\_2\_B Short Inter H...H Contact H14A ..H23 . 1.93 Ang.  
5/2-x,-1/2+y,1/2-z = 2\_745 Check

---

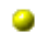

#### Alert level C

GOODF01\_ALERT\_2\_C The least squares goodness of fit parameter lies  
outside the range 0.80 <> 2.00  
Goodness of fit given = 0.798  
PLAT029\_ALERT\_3\_C \_diffn\_measured\_fraction\_theta\_full value Low . 0.967 Why?  
PLAT053\_ALERT\_1\_C Minimum Crystal Dimension Missing (or Error) ... Please Check  
PLAT054\_ALERT\_1\_C Medium Crystal Dimension Missing (or Error) ... Please Check  
PLAT055\_ALERT\_1\_C Maximum Crystal Dimension Missing (or Error) ... Please Check  
PLAT082\_ALERT\_2\_C High R1 Value ..... 0.11 Report  
PLAT084\_ALERT\_3\_C High wR2 Value (i.e. > 0.25) ..... 0.31 Report  
PLAT241\_ALERT\_2\_C High 'MainMol' Ueq as Compared to Neighbors of C27 Check  
PLAT242\_ALERT\_2\_C Low 'MainMol' Ueq as Compared to Neighbors of C28 Check  
PLAT334\_ALERT\_2\_C Small <C-C> Benzene Dist. C25 -C30 . 1.37 Ang.  
PLAT360\_ALERT\_2\_C Short C(sp3)-C(sp3) Bond C13 - C14 . 1.35 Ang.  
PLAT410\_ALERT\_2\_C Short Intra H...H Contact H13A ..H14B . 1.90 Ang.  
x,y,z = 1\_555 Check  
PLAT410\_ALERT\_2\_C Short Intra H...H Contact H13B ..H14A . 1.90 Ang.  
x,y,z = 1\_555 Check  
PLAT420\_ALERT\_2\_C D-H Bond Without Acceptor N2 --H2A . Please Check  
PLAT481\_ALERT\_4\_C Long D...A H-Bond Reported C12 ..N6 . 3.78 Ang.  
PLAT790\_ALERT\_4\_C Centre of Gravity not Within Unit Cell: Resd. # 1 Note  
C29 H30 Cl F N6 O2

---

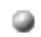

#### Alert level G

PLAT002\_ALERT\_2\_G Number of Distance or Angle Restraints on AtSite 2 Note  
PLAT007\_ALERT\_5\_G Number of Unrefined Donor-H Atoms ..... 1 Report  
PLAT172\_ALERT\_4\_G The CIF-Embedded .res File Contains DFIX Records 1 Report  
PLAT480\_ALERT\_4\_G Long H...A H-Bond Reported H12A ..N6 . 3.08 Ang.  
PLAT480\_ALERT\_4\_G Long H...A H-Bond Reported H27 ..O1 . 2.61 Ang.  
PLAT860\_ALERT\_3\_G Number of Least-Squares Restraints ..... 1 Note  
PLAT870\_ALERT\_4\_G ALERTS Related to Twinning Effects Suppressed .. ! Info  
PLAT883\_ALERT\_1\_G No Info/Value for \_atom\_sites\_solution\_primary . Please Do !  
PLAT933\_ALERT\_2\_G Number of HKL-OMIT Records in Embedded .res File 22 Note

---

0 **ALERT level A** = Most likely a serious problem - resolve or explain

3 **ALERT level B** = A potentially serious problem, consider carefully

16 **ALERT level C** = Check. Ensure it is not caused by an omission or oversight

9 **ALERT level G** = General information/check it is not something unexpected

4 ALERT type 1 CIF construction/syntax error, inconsistent or missing data

12 ALERT type 2 Indicator that the structure model may be wrong or deficient  
 5 ALERT type 3 Indicator that the structure quality may be low  
 6 ALERT type 4 Improvement, methodology, query or suggestion  
 1 ALERT type 5 Informative message, check

---

## Validation response form

Please find below a validation response form (VRF) that can be filled in and pasted into your CIF.

```
# start Validation Reply Form
_vrf_GOODF01_fcl
;
PROBLEM: The least squares goodness of fit parameter lies
RESPONSE: ...
;
_vrf_PLAT026_fcl
;
PROBLEM: Ratio Observed / Unique Reflections (too) Low ..          33% Check
RESPONSE: ...
;
_vrf_PLAT340_fcl
;
PROBLEM: Low Bond Precision on  C-C Bonds .....          0.01407 Ang.
RESPONSE: ...
;
_vrf_PLAT411_fcl
;
PROBLEM: Short Inter H...H Contact  H14A      ..H23      .          1.93 Ang.
RESPONSE: ...
;
_vrf_PLAT029_fcl
;
PROBLEM: _diffrn_measured_fraction_theta_full value Low .          0.967 Why?
RESPONSE: ...
;
_vrf_PLAT053_fcl
;
PROBLEM: Minimum Crystal Dimension Missing (or Error) ...          Please Check
RESPONSE: ...
;
_vrf_PLAT054_fcl
;
PROBLEM: Medium  Crystal Dimension Missing (or Error) ...          Please Check
RESPONSE: ...
;
_vrf_PLAT055_fcl
;
PROBLEM: Maximum Crystal Dimension Missing (or Error) ...          Please Check
RESPONSE: ...
;
_vrf_PLAT082_fcl
;
PROBLEM: High R1 Value .....          0.11 Report
RESPONSE: ...
;
```

```

_vrf_PLAT084_fcl
;
PROBLEM: High wR2 Value (i.e. > 0.25) ..... 0.31 Report
RESPONSE: ...
;
_vrf_PLAT241_fcl
;
PROBLEM: High 'MainMol' Ueq as Compared to Neighbors of C27 Check
RESPONSE: ...
;
_vrf_PLAT242_fcl
;
PROBLEM: Low 'MainMol' Ueq as Compared to Neighbors of C28 Check
RESPONSE: ...
;
_vrf_PLAT334_fcl
;
PROBLEM: Small <C-C> Benzene Dist. C25 -C30 . 1.37 Ang.
RESPONSE: ...
;
_vrf_PLAT360_fcl
;
PROBLEM: Short C(sp3)-C(sp3) Bond C13 - C14 . 1.35 Ang.
RESPONSE: ...
;
_vrf_PLAT410_fcl
;
PROBLEM: Short Intra H...H Contact H13A ..H14B . 1.90 Ang.
RESPONSE: ...
;
_vrf_PLAT420_fcl
;
PROBLEM: D-H Bond Without Acceptor N2 --H2A . Please Check
RESPONSE: ...
;
_vrf_PLAT481_fcl
;
PROBLEM: Long D...A H-Bond Reported C12 ..N6 . 3.78 Ang.
RESPONSE: ...
;
_vrf_PLAT790_fcl
;
PROBLEM: Centre of Gravity not Within Unit Cell: Resd. # 1 Note
RESPONSE: ...
;
# end Validation Reply Form

```

---

It is advisable to attempt to resolve as many as possible of the alerts in all categories. Often the minor alerts point to easily fixed oversights, errors and omissions in your CIF or refinement strategy, so attention to these fine details can be worthwhile. In order to resolve some of the more serious problems it may be necessary to carry out additional measurements or structure refinements. However, the purpose of your study may justify the reported deviations and the more serious of these should normally be commented upon in the discussion or experimental section of a paper or in the "special\_details" fields of the CIF. checkCIF was carefully designed to identify outliers and unusual parameters, but every test has its limitations and alerts that are not important in a particular case may appear. Conversely, the absence of alerts does not guarantee there are no aspects of the results needing attention. It is up to the individual to critically assess their own results and, if necessary, seek expert advice.

### **Publication of your CIF in IUCr journals**

A basic structural check has been run on your CIF. These basic checks will be run on all CIFs submitted for publication in IUCr journals (*Acta Crystallographica*, *Journal of Applied Crystallography*, *Journal of Synchrotron Radiation*); however, if you intend to submit to *Acta Crystallographica Section C* or *E* or *IUCrData*, you should make sure that full publication checks are run on the final version of your CIF prior to submission.

### **Publication of your CIF in other journals**

Please refer to the *Notes for Authors* of the relevant journal for any special instructions relating to CIF submission.

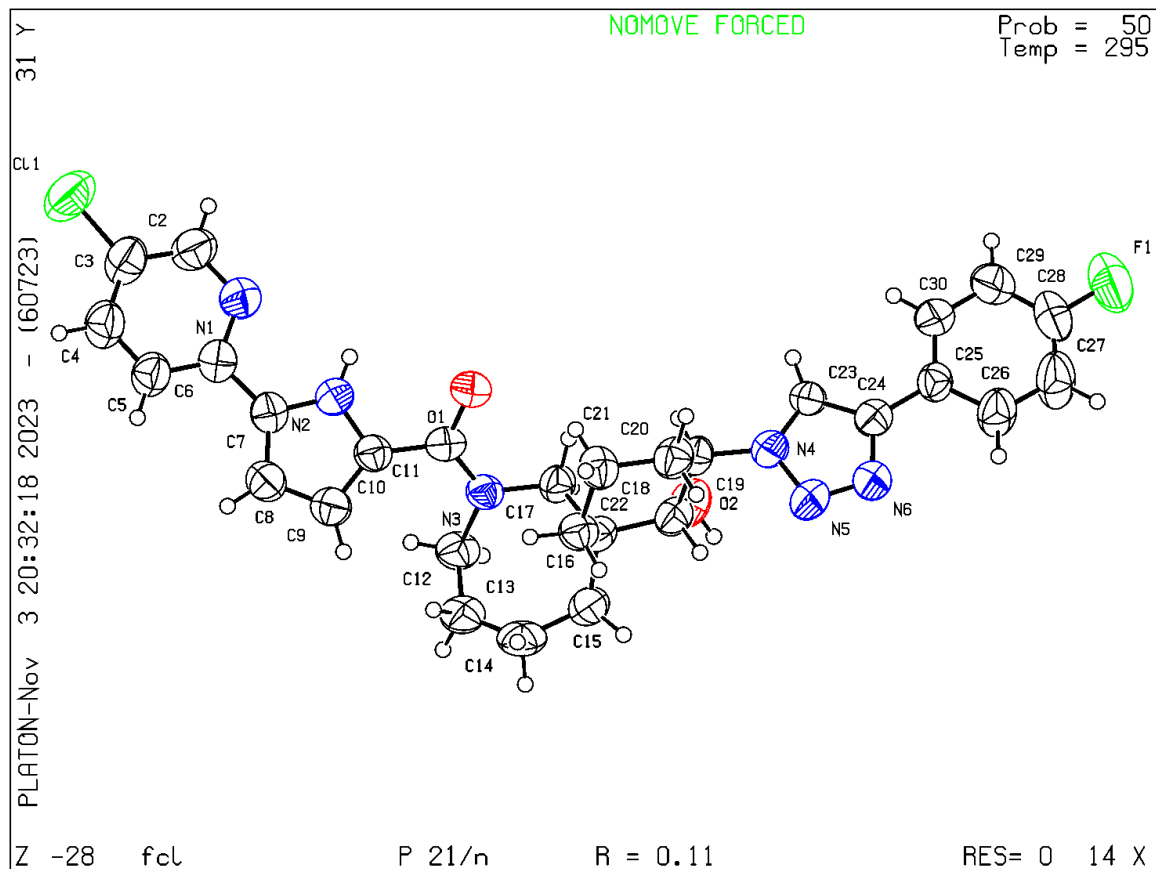

Supplement: Supplementary file 1 [file supplementary]
